# Supplementary material for: Low-temperature thermochronology and its geological significance in the central and northern section of the western margin of the Ordos Basin
Source: Copernicus journal article supplement (doi:10.5194/egusphere-2024-3191), 2024-12-05
Supplement: Supplementary file [file egusphere-2024-3191-RC1-supplement.pdf]

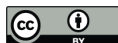

1 **Low-temperature thermochronology and its**  
2 **geological significance in the central and northern**  
3 **section of the western margin of the Ordos Basin**

4 Guangyuan Xing<sup>1,2</sup>, Zhanli Ren<sup>1,2\*</sup>, Kai Qi<sup>1,2</sup>, Sasa Guo<sup>1,2</sup>, Yanzhao Liu<sup>1,2</sup>,  
5 Ying Zhang<sup>3</sup>, Huaping Lan<sup>4</sup>

6 <sup>1</sup> *Department of Geology, Northwest University, Xi'an 710069, China;*

7 <sup>2</sup> *State Key Laboratory of Continental Dynamics, Northwest University, Xi'an 710069,*  
8 *China;*

9 <sup>3</sup> *Research Institute of Yanchang Petroleum(Group) Co.Ltd., Xi'an 710075, China;*

10 <sup>4</sup> *Research Institute No. 203 of Nuclear Industry, Xi'an 710000, China*

11 Correspondence to: Zhanli Ren

12 E-mail: renzhanl@nwu.edu.cn

13 **Abstract:** The study of low-temperature thermochronology at plate edges  
14 provides favorable constraints for regional tectonic evolution and surface  
15 processes. Based on the existing thermochronological data of multiple  
16 cooling events since the Mesozoic era, we conducted apatite fission track  
17 and apatite (U-Th)/He studies on drilling samples from the middle and  
18 northern parts of the western margin of the Ordos Basin, revealing the  
19 uplift and cooling history and differences in the middle and northern parts  
20 of the western margin of the Ordos Basin. The new thermal history  
21 simulation results show that the Zhuozishan Mountain(Mt.) part  
22 experienced large-scale uplift in the Late Jurassic (160Ma-150Ma), slow  
23 uplift at 130Ma-30Ma and severe uplift after 30Ma; The Taole -  
24 Hengshanbao part began to uplift at 155Ma-145Ma, slowly uplifted at  
25 145Ma-30Ma, and then violently uplifted; The Majiatan - Huianbao part  
26 experienced large-scale uplift at 158Ma-137Ma, with a slightly slower



27 uplift rate at 137Ma-110Ma, and entered a severe uplift stage again at  
28 70Ma-50Ma. The Late Jurassic tectonic uplift indicated by  
29 thermochronology corresponds to the formation of the western margin  
30 thrust fold structure, with the northern and southern sections starting  
31 earlier and the middle section starting slightly later. This is related to the  
32 different tectonic evolution and stress in their location, and the  
33 differences in uplift rate and time may be related to the impact of multiple  
34 Yanshanian orogeny on the region.

35 **Keyword:** Ordos Basin; North China Block; Plate convergence;  
36 Low-temperature thermochronology; Yanshanian orogeny

37

## 38 **1 Introduction**

39 The North China Craton, as one of the oldest cratons in the world,  
40 has a long history spanning 3.8 billion years (Zhai, 2010; Zhang et al.,  
41 2018). Having undergone prolonged and complex tectonic evolution, it  
42 records nearly all major tectonic events from ancient to the present,  
43 especially preserving multi-phase evolutionary remnants since 1.8 billion  
44 years ago (Peng et al., 2022). The Ordos Block is part of the North China  
45 Craton and one of its core geological units (Bao et al., 2019; Zhai, 2021).  
46 The present-day Ordos Basin, in a narrow sense, is located in the western  
47 part of the North China Craton. It was formed on the foundation of the  
48 North China Craton through multiple phases of transformation,



49 particularly since the Mesozoic, eventually developing into a residual  
50 intracratonic basin (Ren et al., 1995; Zhai, 2021). This basin is  
51 superimposed on a large Paleozoic basin, making it a composite basin  
52 (Liu et al., 2005). The Ordos Basin contains the most complete  
53 sedimentary strata in the North China region and is rich in multiple  
54 energy resources, including oil, gas, coal, and uranium, making it a highly  
55 resource-abundant basin.

56 The thrust belt along the western margin of the Ordos Basin spans  
57 across different tectonic units, including the North China Craton, the Alxa  
58 Block, the Central Asian Orogenic Belt, the Qinling Orogenic Belt, and  
59 the northeastern edge of the Tibetan Plateau (Fig.1). It is one of the  
60 regions with the most intense tectonic deformation within the Chinese  
61 mainland since the Mesozoic, recording numerous intracontinental  
62 deformation and orogenic events since the Phanerozoic. Additionally, the  
63 western margin of the Ordos Basin lies in the northern segment of the  
64 North-South Tectonic Belt of China, connecting different tectonic units  
65 between the western and eastern parts of northern China (Dong et al.,  
66 2021).

67 The study area is located in the central-northern section of the  
68 western margin of the Ordos Basin (Fig. 1). Influenced by multiple  
69 tectonic movements, the region has a complex evolutionary history, with  
70 several large-scale, north-south-oriented thrust faults. In general, the



71 northern part of this tectonic belt is believed to result from interactions  
72 between adjacent tectonic blocks. Over the years, various scholars have  
73 conducted extensive research on the structural characteristics and  
74 properties of the northern section of the western margin (Yang et al., 1986;  
75 Tang et al., 1988, 1992; Gan et al., 1990; Liu et al., 1995; Zhao et al.,  
76 1990), its formation mechanisms (Liu et al., 1997; Liu et al., 2005;  
77 Ouyang et al., 2012; Yang et al., 2011; Yang et al., 2006, 2008; Zhao et al.,  
78 2003, 2006, 2007a, c), and provenance (Jiang et al., 2019). Regarding the  
79 overall uplift process along the western margin, many scholars, using  
80 apatite fission track methods, suggest that the uplift in the southern  
81 section of the western margin began in the Middle to Late Jurassic (Chen  
82 et al., 1999, 2007; Gao et al., 2000; Zhang et al., 2000; Zhao et al., 2003,  
83 2006, 2007b; Zhao et al., 2017; Li et al., 2019; Ma et al., 2019; Peng  
84 Heng, 2020; Tian et al., 2023). Due to the presence of an east-west  
85 transfer zone in the Qingtongxia-Majiatan area, the western margin can  
86 be divided into three distinct tectonic systems: southern, central, and  
87 northern, based on differences in structural characteristics and  
88 sedimentation (Zhao et al., 2006). In the northern part of the western  
89 margin, including the Helanshan Mt. region, low-temperature  
90 thermochronology studies are relatively scarce and have mainly focused  
91 on the Helanshan Mt. area (Ma et al., 2019; Zhao et al., 2007a; Liu, 2010),  
92 the Zhuozishan Mt. region (Zhuo, 2015; Li, 2006), the 38°N Tectonic



93 Belt and adjacent areas (Gao, 2014; Zhao et al., 2007b, c; Ma et al., 2019;  
94 Li, 2019), and drilling wells such as LS1 well, T1 well, and TS1 well (Ren  
95 et al., 1995). 

96 From the limited published thermochronological data, it is evident  
97 that the study area entered an uplift evolution stage during the Mesozoic,  
98 but the timing and rate of uplift vary across different regions. The  
99 structural differences between the basin margin and the interior have not  
100 been well clarified. Current research lacks a comprehensive perspective  
101 and does not provide a systematic understanding of tectonic events in the  
102 central-northern section of the western margin of the Ordos Basin since  
103 the Mesozoic. This greatly limits further insights into the overall tectonic  
104 evolution of the area and poses significant challenges for deeper research  
105 into intracontinental deformation in the basin and its surrounding regions.

106 This study utilizes low-temperature thermochronology methods,  
107 combined with thermal history modeling and existing geological evidence,  
108 to precisely constrain the uplift and cooling history of the central-northern  
109 section of the western margin of the Ordos Basin. The research helps  
110 improve our understanding of the evolution and tectonic processes in this  
111 region since the Mesozoic, ~~providing important evidence for studying the~~  
112 ~~formation and evolution of the Ordos Basin and the tectonic deformation~~  
113 ~~that occurred along the basin's margins during the Mesozoic.~~ Additionally,  
114 it offers a foundational reference for future oil and gas exploration efforts



115 ~~in the western margin of the basin.~~

## 116 **2 Geological setting**

117 The Ordos Basin, as one of the key geological ~~units~~ of the North  
118 China Craton, is a large composite basin formed during different periods,  
119 ~~across varying extents, and under diverse geodynamic settings (Ren et al.,~~  
120 ~~2020). Based on the basin types and tectonic evolutionary characteristics~~  
121 ~~of different eras, the basin's evolution~~ can be divided into several stages:  
122 Archean-Paleoproterozoic basement formation ~~stage~~, Mesoproterozoic -  
123 Neoproterozoic rift basin development ~~stage~~, Early Paleozoic stable  
124 continental margin sedimentation ~~stage~~, Late Paleozoic to Middle Triassic  
125 intracratonic basin evolution ~~stage~~, Late Triassic to Jurassic  
126 intracontinental depression basin evolution ~~stage~~, Early Cretaceous  
127 westward contraction of the depression basin, Late Cretaceous to  
128 Cenozoic significant uplift, Formation of Cenozoic fault-depression  
129 basins in the surrounding areas (Liu et al., 2006; Ren et al., 2020; Li,  
130 2006).

131 In order to more precisely define the differences in the later uplift  
132 and cooling processes, this article further divides the research area into  
133 the Zhuozishan Mt. part, the Taole-Hengshanbao part, and the  
134 Majiatan-Huianbao part.

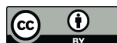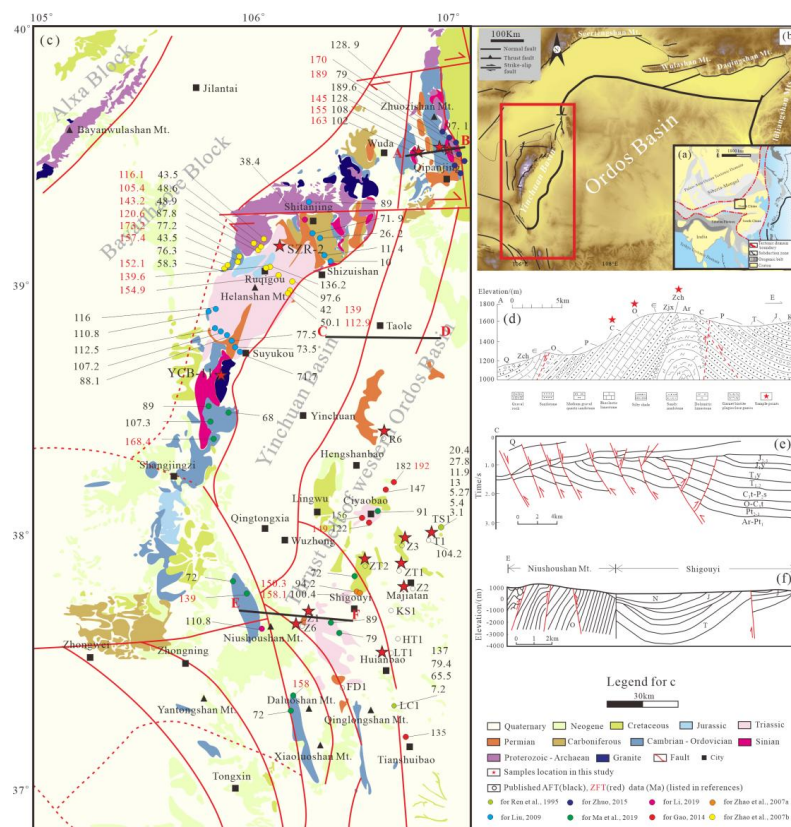

135  
 136 Fig.1 (a) Tectonic setting of China (modified from Peng et al., 2019), (b) Digital  
 137 elevation model of the Ordos basin (modified from Shi et al., 2020), (c) Geological  
 138 map of the central-northern section of the western margin of the Ordos Basin  
 139 (modified from Ma, 2019) and compilation of previously published low-temperature  
 140 thermochronology data, (d) W - E trending simplified geological profile A-B studied  
 141 in this article (modified from Zhuo, 2015), (e) W - E trending simplified geological  
 142 profile C-D studied in this article (modified from Zhao, 2006), (f) W - E trending  
 143 simplified geological profile C-D studied in this article (modified from Ma, 2019).

144 In the Zhuozishan Mt. part, faults thrust from west to east, consisting  
 145 of the Bayin'aobao thrust sheet, the Wuhushan thrust sheet, the Gandel  
 146 Mountain thrust sheet, and the Zhuozishan Mt. thrust sheet. The  
 147 Zhuozishan anticline is located near the basin, with an east-west length of  
 148 approximately 10 km. The core of the anticline exposes older strata, with  
 149 Archean granitic gneiss of the Qianlishan Group at its core. Moving



150 westward, it sequentially exposes the Changcheng System Huangqikou  
151 Formation, Jixian System Wangquankou Formation, Cambrian Taosigou  
152 Formation, Hulusitai Formation, Zhangxia Formation, Abuqiehai  
153 Formation, Ordovician Sandaokan Formation, Zhuozishan Formation,  
154 and the Permian Shanxi Formation and Shihezi Formation (Fig. 1d).

155 In this study, the central part of the research area is defined as the  
156 Taole-Hengshanbao part. Overall, the structural line in this region is  
157 distributed in a nearly north-south orientation, and its structural  
158 characteristics differ from those of the Zhuozishan Mt. part. The faults in  
159 this area exhibit high-angle thrusting from east to west, characterized by a  
160 series of imbricated thrust faults (Fig. 1e). Additionally, this part  
161 corresponds to the Yinchuan Graben to the west, and their tectonic  
162 evolution is closely related (Zhao, 2006).

163 The Majiatan-Huianbao part is characterized by typical thrust nappe  
164 structures, with four west-dipping thrust faults developing from west to  
165 east. These faults exhibit steep upper angles and gentle lower angles.  
166 From west to east, the major thrust sheets include the Weizhou thrust  
167 sheet, Qinglongshan thrust sheet, Shigouyi thrust sheet, and Yandunshan  
168 thrust sheet. Among them, the Shigouyi thrust sheet, in an anticlinal form,  
169 is situated between the Qingshanlong Fault and the Huianpu-Shajingzi  
170 Fault (Fig. 1f).

171 In the Hengshanbao area, east-dipping faults are dominant, while the





172 Majiatan-Huianbao part primarily features large west-dipping faults. The  
173 38°N structural zone between these regions plays a regulatory role, and  
174 the different structural styles on both sides have created distinct types of  
175 traps. This has resulted in the concentration of oil and gas fields along the  
176 western margin of the basin, particularly in the Shigouyi and Majiatan  
177 areas (Gao, 2014; He et al., 2021).

### 178 **3 Sampling strategy and methodology**

#### 179 **3.1 Previous thermochronological data**

180 This study collected a total of 85 published low-temperature  
181 thermochronology data from the western margin of the Ordos Basin,  
182 specifically between the Zhuozishan Mt. and the Tianshuibao, including  
183 62 apatite fission track ages and 23 zircon fission track ages (Fig. 2).  
184 Samples with higher mineral closure temperatures exhibit older apparent  
185 ages. The ages of apatite samples range from 3.1 Ma to 189.6 Ma, while  
186 zircon fission track ages range from 105.4 Ma to 192 Ma. These findings  
187 indicate a long cooling history and a complex uplift process in the study  
188 area. Based on the collected data, we plotted histograms and kernel  
189 density estimation curves, revealing that the density peaks for apatite  
190 fission tracks and zircon fission tracks are at 78 Ma, 101 Ma, and 153 Ma,  
191 respectively.

192

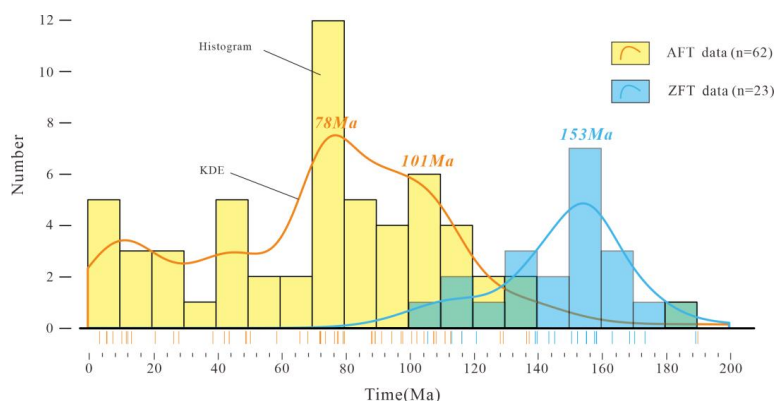

193

194 Fig.2 Histogram and kernel density estimation (KDE) plot of published  
195 geochronological dates in the central-northern section of the western margin of the  
196 Ordos Basin. The bandwidth and bin width are both set to 10 Ma for all plots when  
197 the graph is drawn.

198

In summary, previous thermochronological data indicate that  
199 multiple cooling events have occurred in the region since the Mesozoic  
200 era (Ren et al., 1995; Zhao et al., 2007a, b; Liu, 2010; Zhuo, 2015; Gao,  
201 2014; Li, 2019; Ma et al., 2019). However, due to a lack of chronological  
202 methods, the cooling history of the study area during the late Cenozoic  
203 has not been well constrained.

204

### 3.2 Sample collection and experimental methods

205

This study applies thermochronology to constrain the spatiotemporal  
206 evolution of the upper few kilometers of the lithosphere. As one of the  
207 most widely used and effective thermochronological methods (Gleadow  
208 and Seiler, 2015; Peng, 2020), apatite fission track analysis is sensitive to  
209 temperature variations in the range of 60°C to 120°C (the partial  
210 annealing zone), while apatite (U-Th)/He dating is suitable for defining  
211 the time-temperature history in the range of 40°C to 75°C (Ketcham,



212 2005; Gallagher, 2012; Flowers et al., 2015; Farley et al., 2002).

213 To systematically study the differences in uplift and cooling ~~in the~~  
214 ~~central-northern part of the western margin~~, the relationship between  
215 structural evolution at the basin edge and within the basin, and to address  
216 the current gaps in thermochronology in the research area, this study  
217 collected 16 valuable samples, including 11 core samples from 9 drilling  
218 wells and 5 field outcrop samples. ~~Apatite fission track analysis and~~  
219 ~~apatite (U-Th)/He dating were employed for chronological analysis.~~ The  
220 samples are well-distributed across the entire **central-northern region of**  
221 **the western margin** and are representative **of various stratigraphic levels.**  
222 **After obtaining the samples, apatite was separated using conventional**  
223 **heavy liquid and magnetic separation methods.**

224 ~~All 16 samples were analyzed using apatite fission track (AFT)~~  
225 ~~methodology.~~ After selecting mineral grains, the samples were prepared,  
226 tested, and analyzed at the Petroleum Thermochronology Laboratory in  
227 the Department of Geology at Northwest University. The calculation  
228 method for AFT ages follows Hasebe et al. (2004), and ages were  
229 analyzed using RadialPlotter software (Vermeesch, 2009) (Fig.3, **4a**).  
230 Additionally, the HeFTy software was utilized to simulate the cooling  
231 history (Ketcham, 2005).

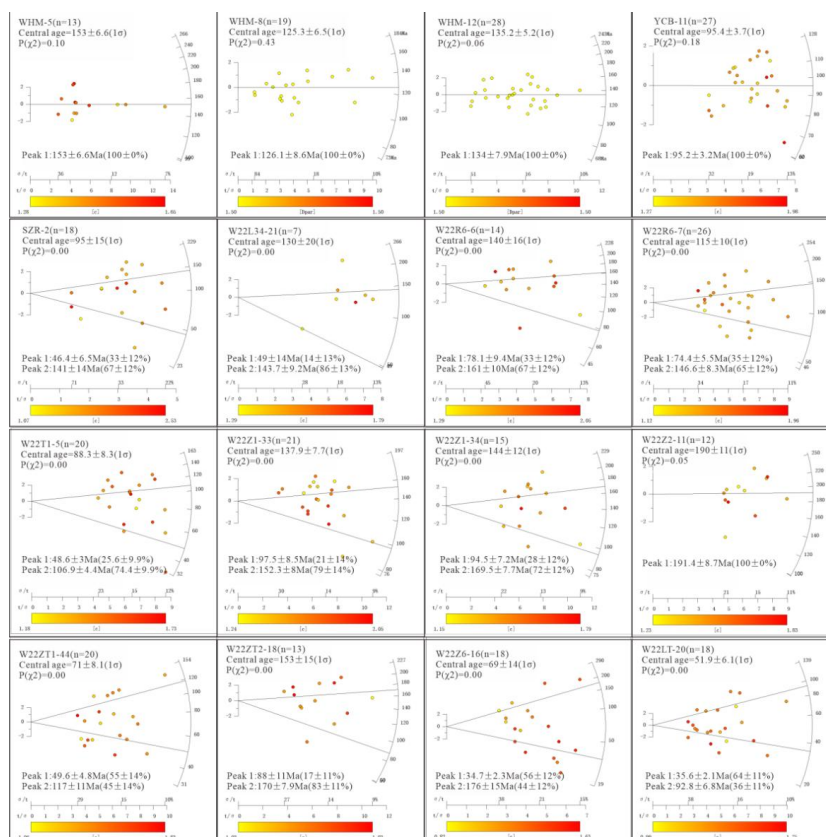

232 Fig.3 AFT age Radial plots for samples (WHM-5, 8, and 12 are the data that the  
 233 author will soon publish, while the rest are newly published data in this paper).  
 234

235 Additionally, following three criteria—selecting well-formed, pure  
 236 grains and ensuring that the crystal dimensions perpendicular to the c-axis  
 237 exceed 60-70 μm—apatite grains from samples Z1-33 and ZT2-18 were  
 238 chosen under a high magnification (160x) binocular microscope for  
 239 (U-Th)/He (AHe) dating. This experiment was conducted at the  
 240 Argon-Argon and U-Th-He Geochronology Laboratory of the Institute of  
 241 Geology and Geophysics, Chinese Academy of Sciences. ~~The thermal~~  
 242 ~~history of the samples was also modeled using HeFTy software (Ketcham,~~  
 243 ~~2005).~~



## 244 4 Results

### 245 4.1 Low-temperature thermochronology results

#### 246 4.1.1 Zhuozishan Mt. part

247 The AFT central ages of the three sandstone samples from the  
248 Zhuozishan Mt. part (WHM-5, WHM-8, WHM-12) are  $153\pm 6.6$  Ma,  
249  $125\pm 6$  Ma, and  $135\pm 5$  Ma, respectively, all of which are significantly  
250 younger than the stratigraphic ages ~~from which the samples were derived.~~

251 The average track lengths are  $12.16\pm 1.54$   $\mu\text{m}$ ,  $11.43\pm 1.55$   $\mu\text{m}$ , and  
252  $13.3\pm 1.7$   $\mu\text{m}$ , all of which are shorter than the spontaneous track original  
253 length of  $16.3\pm 0.9$   $\mu\text{m}$ , indicating that the samples have undergone  
254 annealing and cooling processes. All three samples passed the  $\chi^2$  test  
255 ( $P(\chi^2) > 5\%$ ), suggesting that each sample contains a single age  
256 component. The RadialPlotter software provided single ages of  $153\pm 6.6$   
257 Ma,  $126.1\pm 8.6$  Ma, and  $134.7\pm 7.9$  Ma (Fig. 4b), which are consistent  
258 with the central ages within a certain error range. The age of  $153\pm 6.6$  Ma  
259 may represents a tectonic event in the Late Jurassic, ~~while~~  $134.7\pm 7.9$  Ma  
260 may corresponds to an early tectonic event in the Early Cretaceous, and  
261  $126.1\pm 8.6$  Ma may indicates a tectonic event in the Late Early  
262 Cretaceous.

#### 263 4.1.2 Taole-Hengshanbao part

264 The AFT central ages of the two samples from well R6 (R6-6 and  
265 R6-7) are  $140.4\pm 15.7$  Ma and  $115.3\pm 10.2$  Ma, with average track lengths



266 of  $11.66 \pm 1.02 \mu\text{m}$  and  $12.1 \pm 1.52 \mu\text{m}$ , respectively. The AFT central age  
267 of the sample from well L34 (L34-21) is  $130 \pm 19.8 \text{ Ma}$ . In the Helanshan  
268 Mt. area, the AFT central ages of samples SZR-2 and YCB-11 are  
269  $95.2 \pm 14.8 \text{ Ma}$  and  $95.4 \pm 3.7 \text{ Ma}$ , with average track lengths of  $12.01 \pm 1.68$   
270  $\mu\text{m}$  and  $12.88 \pm 1.11 \mu\text{m}$ , respectively. The AFT central ages of these five  
271 samples in this region are significantly younger than the stratigraphic  
272 ages from which they were derived, indicating that the samples have  
273 undergone annealing and cooling processes. Only the YCB-11 sample  
274 passed the  $\chi^2$  test, with the RadialPlotter software providing a single peak  
275 age of  $95.2 \pm 3.2 \text{ Ma}$ . The remaining four samples did not pass the  $\chi^2$  test,  
276 suggesting that each sample contains at least two age populations. The  
277 RadialPlotter software (Vermeesch, 2009) was used to decompose the  
278 ages, and these peak ages record potential tectonic activities in this region  
279 during the Late Jurassic, early Early Cretaceous, late Early Cretaceous,  
280 Late Cretaceous, and Eocene epochs (Fig. 4c).

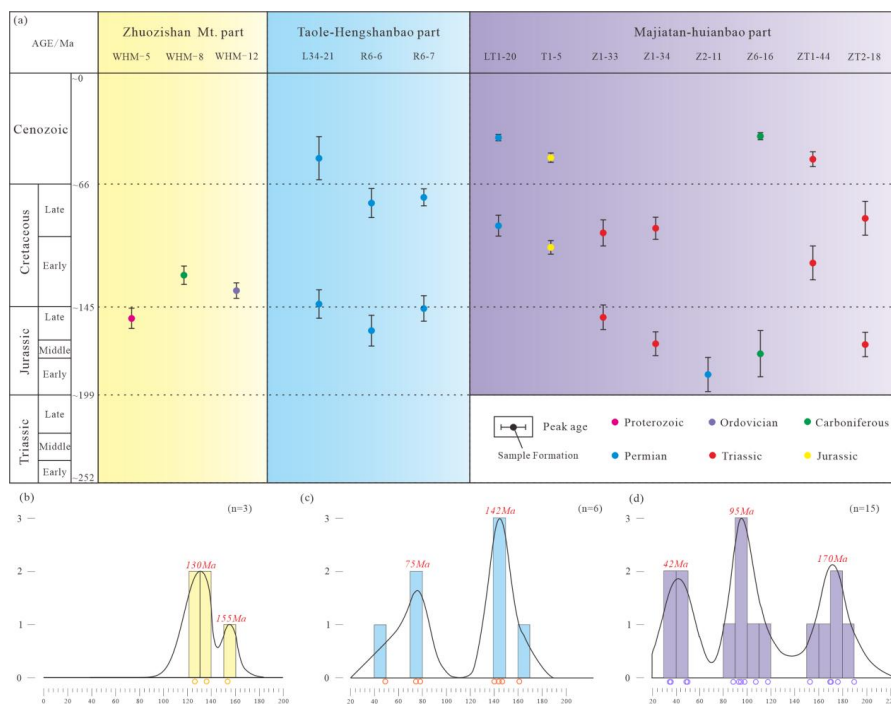

281

282 Fig.4 (a) The peak age distribution map of the three areas in the study region. (b),  
 283 (c), (d), Histogram and kernel density estimation (KDE) plot of new **geochronological**  
 284 dates in Zhuozishan Mt. part, Taole-Hengshanbao part, and Majiatan-Huianbao part.

### 285 4.1.3 Majiatan-Huianbao part

286 Due to this region being a sweet spot for oil and gas exploration, a  
 287 large number of drilling samples are available. Except for sample Z2-11,  
 288 which passed the  $\chi^2$  test, the remaining samples did not pass the test. The  
 289 ages range from 35.6 to 189.5 Ma and were statistically divided into three  
 290 peak values: 42 Ma, 95 Ma, and 170 Ma. All of these ages are  
 291 significantly younger than the stratigraphic ages ~~from which they were~~  
 292 ~~derived~~, indicating that they have undergone uplift and cooling processes  
 293 (Fig. 4d). The three single-grain AHe ages for sample Z1-33 range from  
 294 61.64 Ma to 67.06 Ma, while the three single-grain AHe ages for sample



295 ZT2-18 range from 50.69 Ma to 56.31 Ma, with no significant correlation  
296 to eU, recording late uplift and cooling events (Fig. 5).

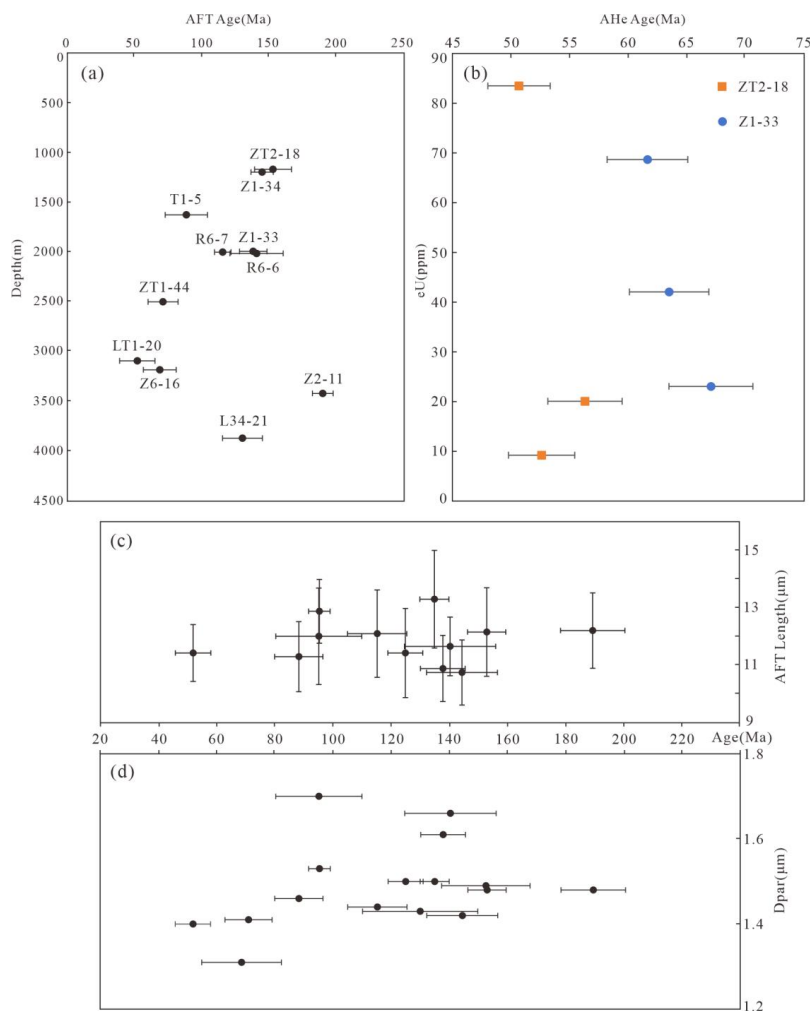

297  
298 Fig.5 Relationships between AFT Age and (a) depth, (c) AFT length, and (d)  
299 Dpar, (b) relationships between AHe age and eU.

300 In addition, the correlation between track length and AFT age  
301 indicates a complex cooling history in the region. Considering the  
302 different annealing dynamics (Ketcham et al., 2007), the chemical  
303 composition of the grains may influence the AFT age and length (Carlson





304 et al., 1999; Barbarand et al., 2003). However, the Dpar values in the  
305 samples range from 1.31  $\mu\text{m}$  to 1.70  $\mu\text{m}$ , showing minimal variation and  
306 no significant correlation with the AFT ages. This suggests that the  
307 influence of chemical composition on AFT age is either minimal or  
308 nonexistent.

#### 309 **4.2. Thermal history modeling**

310 Due to the complexity of annealing processes, the measured  
311 apparent ages lack any practical geological significance (Flowers et al.,  
312 2015). By utilizing the measured ages, track lengths, Dpar values, and  
313 other parameters, this thermal history can be inversely modeled (Ketcham,  
314 2005). In this study, HeFTy version 1.6.7 was used for inverse modeling  
315 (Ketcham, 2005), in conjunction with all available low-temperature  
316 thermochronology data for path analysis. The Ketcham (2005)  
317 multi-dynamic annealing model was selected for the inversion simulation,  
318 along with the corrected confined track lengths. The original confined  
319 track length was set at 16.3  $\mu\text{m}$ , and the present-day surface temperature  
320 was 20°C. The goodness-of-fit parameter (GOF) was used to indicate  
321 how well the simulation results matched the actual measurements; a  
322 higher value signifies a better fit. When the GOF value obtained from the  
323 simulation exceeds 0.05, it indicates that the simulation results are  
324 acceptable, while a GOF value greater than 0.5 indicates a very good  
325 match. The simulated ages and lengths both had GOF values greater than



326 0.5 and close to 1, suggesting that the simulation results closely aligned  
327 with the measured values.

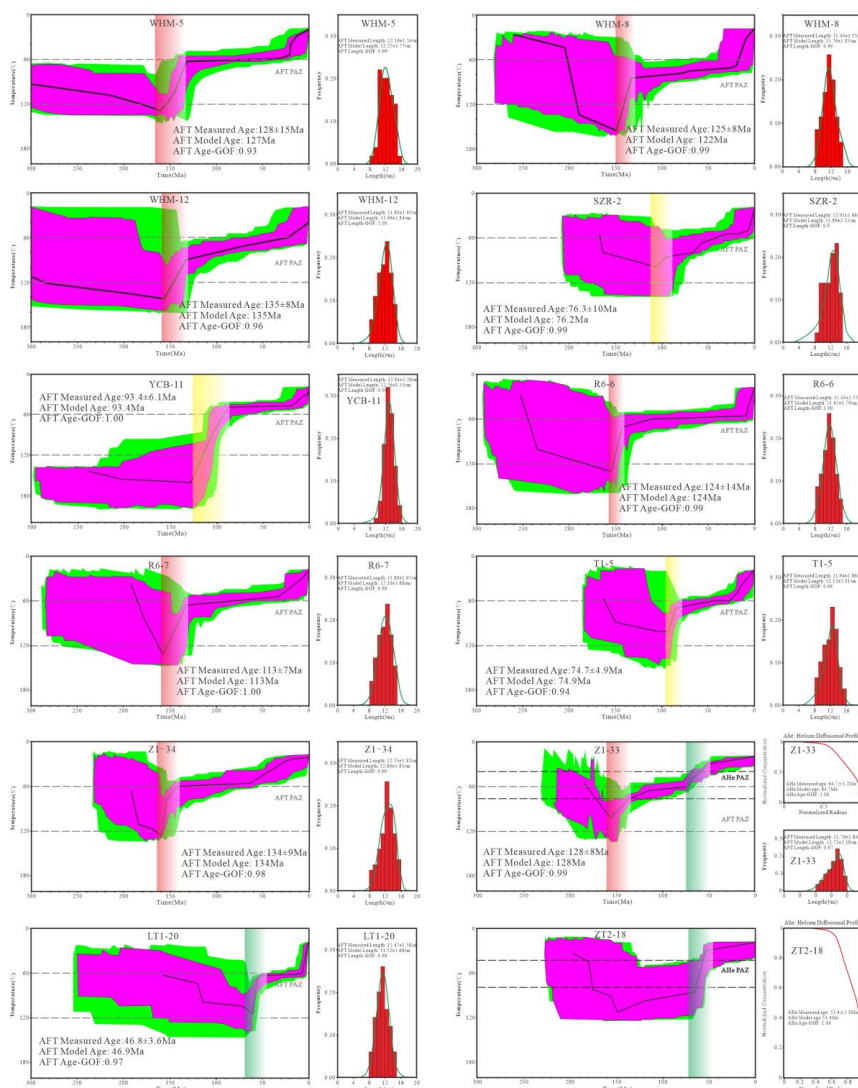

328  
329 Fig.6 Thermal history inverse modeling calculated by HeFTy (Ketcham, 2005),  
330 using the model of Ketcham et al. (2007) and Flowers et al. (2009). HeFTy modeling  
331 tests possible t - T curves by using the Monte-Carlo inverse modeling approach.  
332 Shaded parts of different colors represent different cooling periods.

333 Among the 16 samples, 12 with more extensive length information  
334 were selected for thermal history simulation, representing a broad



335 distribution across the study area to assess their potential thermal history  
336 and determine their uplift cooling times. The goodness-of-fit parameters  
337 for both length and age in this simulation were above 0.90, indicating a  
338 good fit. The inverted time-temperature paths are shown in Fig. 6.

## 339 **5 Discussion**

340 From the thermal history simulation paths, the uplift initiation times  
341 for the three sample sections generally fall in the late Jurassic; however,  
342 there are still differences. The middle Taole-Hengshanbao part was  
343 uplifted later, while the northern and southern parts were uplifted earlier,  
344 which is related to the tectonic evolution and stress of their respective  
345 locations. Additionally, the uplift intensity varies from east to west across  
346 the regions. For example, in the northern part, the uplift rate of the  
347 Changcheng System, which is closer to the core of the syncline on the  
348 eastern side of the Zhuzishan syncline, is faster than that of the Paleozoic  
349 strata on the western side. The samples from the southern part indicate  
350 that uplift occurred earlier in the western samples compared to those in  
351 the eastern side. These observations are closely linked to the reverse  
352 thrusting and imbrication along the western margin (Fig. 7).

### 353 **5.1 Uplift Process Differences and Geological Responses in the** 354 **North-Central Western Margin Constrained by Low-Temperature** 355 **Thermochronology**

#### 356 **5.1.1 Zhuozishan Mt. part**



357           The thermal history inversion results for the three samples from the  
358 northern Zhuozishan Mt. part indicate that the region underwent three  
359 major uplift stages after the Mesozoic: Late Jurassic (160 Ma - 150 Ma),  
360 This marks the first major uplift stage in the area, with an average uplift  
361 rate of ca. 45 m/Ma and an average cooling rate of ca. 2°C/Ma. This uplift  
362 corresponds to the early stages of the Yanshanian orogeny in the region,  
363 triggering reverse thrusting and imbrication, as evidenced by the  
364 inversion results of all three samples. Stratigraphically, the Late Jurassic  
365 deposits are largely absent in the study area, with the Middle Jurassic  
366 Anding Formation directly in contact with the Lower Cretaceous strata;  
367 Early Cretaceous (130 Ma - 30 Ma), This stage represents a period of   
368 slow cooling, suggesting the absence of significant tectonic events during  
369 this time. The timing and uplift differences among the samples during this  
370 phase may reflect the varying effects of different episodes of the  
371 Yanshanian orogeny (stages II, III, and IV) on the region; Cenozoic (since  
372 ca. 30 Ma), The most recent uplift stage is associated with the Himalayan  
373 orogeny, which caused further significant uplift in the region.

374           In terms of the spatial distribution of the Zhuzishan anticline (Fig.  
375 1d), the WHM-5 sample from the Changcheng System on the eastern side  
376 of the anticline entered and exited the partial annealing zone earlier than  
377 the WHM-8 sample from the Taiyuan Formation on the western side. This  
378 sequence aligns with the recorded ages. Additionally, the eastern side,



379 closer to the core of the anticline, exhibits a faster uplift rate in the  
380 Changcheng System compared to the Paleozoic strata on the western side,  
381 with the Ordovician strata showing intermediate uplift rates. Combined  
382 with previous analyses of Mesozoic samples on the eastern flank of the  
383 Zhuzhishan anticline, the general conclusion is that the core of the  
384 anticline experienced rapid uplift, while the flanks uplifted more slowly,  
385 indicating a differential uplift process (Zhuo, 2015).

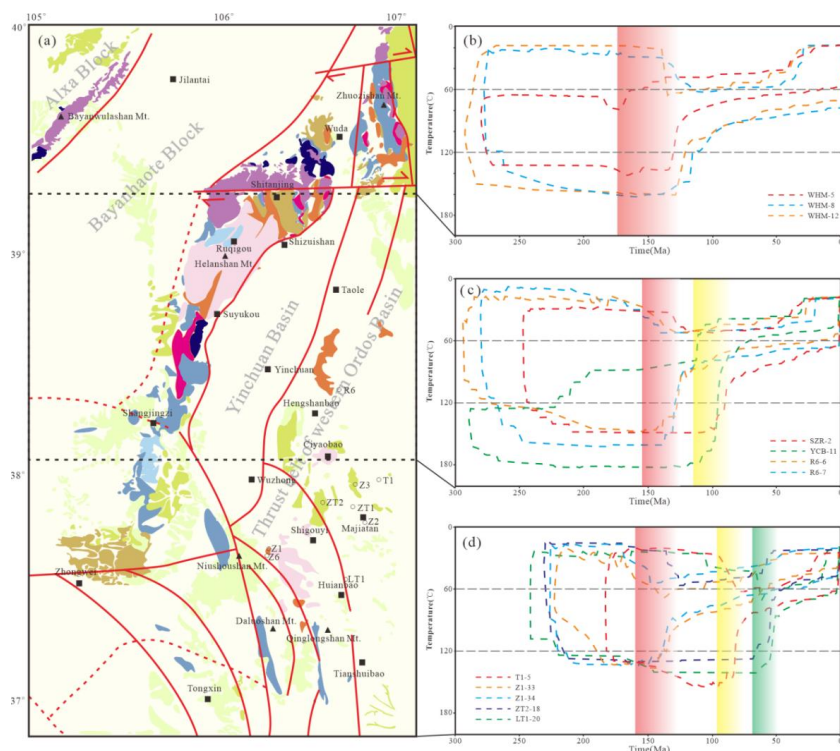

386  
387 Fig.7 Summary of all available thermochronology modeling history (envelope  
388 path) for central-northern section of the western margin of the Ordos Basin.

### 389 5.1.2 Taole-Hengshanbao part

390 In the Taole-Hengshanbao part, two samples from well R6 have peak  
391 ages of 161 Ma, 146 Ma, 78 Ma, and 74 Ma, suggesting possible tectonic



392 events during the Late Jurassic and Late Cretaceous. The thermal history  
393 models of both samples show similar results, indicating three phases of  
394 uplift: Late Jurassic (155 Ma-145 Ma), a period of significant uplift  
395 begins; Early Cretaceous (145 Ma-30 Ma), this phase is characterized by  
396 slow uplift; Cenozoic (ca. 30 Ma-), a period of intense and rapid uplift  
397 occurs. The ages recorded in samples R6-6 and R6-7 are consistent within  
398 the error range. The slight differences in their AFT model results arise  
399 because R6-6 was located deeper, meaning it exited the partial annealing  
400 zone later than R6-7 during uplift. This caused the AFT age constraints  
401 for R6-6 to be slightly younger.

402 The uplift in this part is related to the uplift in the neighboring  
403 Helanshan Mountain region and the intense faulting and subsidence in the  
404 Yinchuan Graben. The thermal history models of the two Helanshan  
405 Mountain samples (SZR-2 and YCB-11) show a spatial pattern: the  
406 southern YCB-11 sample experienced rapid cooling at the end of the  
407 Early Cretaceous (130 Ma-95 Ma), followed by slow cooling until the  
408 Eocene (~35 Ma), after which it rapidly uplifted to the surface. The  
409 northern SZR-2 sample, however, shows a delayed cooling history, with  
410 cooling events occurring primarily after the Early Cretaceous. The uplift  
411 pattern, with earlier uplift in the south and later uplift in the north, aligns  
412 with previous studies on the Helanshan Mountain region (Ma et al.,  
413 2019).



### 414 **5.1.2 Majiatan-Huianbao part**

415 In the southern, Majiatan-Huianbao part, two samples from well Z1  
416 (Z1-33 and Z1-34) indicate that uplift in the well began during the Late  
417 Jurassic (ca. 160 Ma). Combined AFT and AHe inversion results show  
418 that sample Z1-33 experienced rapid uplift between 158 Ma and 137 Ma,  
419 followed by slower uplift from 137 Ma to 110 Ma, and then entered  
420 another phase of intense uplift between 70 Ma and 50 Ma. Sample Z1-34,  
421 constrained only by AFT data, shows large-scale uplift starting from 160  
422 Ma to 140 Ma, a slow uplift phase from 140 Ma to 64 Ma, and then a  
423 rapid uplift event. Since the temperature at 64 Ma is beyond the  
424 AFT-sensitive temperature range, the thermal history model of well Z1,  
425 especially for the later stages of uplift and cooling, is more reliably  
426 constrained by the dual-dating sample Z1-33. The AFT simulation of  
427 sample LT1-20 reveals an uplift event between 60 Ma and 55 Ma, and the  
428 AHe thermal history simulation of sample ZT2-18 similarly shows an  
429 uplift event from 62 Ma to 52 Ma. This indicates an early Cenozoic  
430 tectonic cooling event in the region. For the T1-5 sample, located in the  
431 Tianhuan syncline, uplift began at the end of the Early Cretaceous. This  
432 area previously had a complete sedimentary sequence and extensive  
433 sediment distribution, forming the thick Tianhuan syncline in the Ordos  
434 Basin (Zhao et al., 2007a).

### 435 **5.2 Transformation of the Meso-Cenozoic Tectonic Regime and**



436 **Regional Dynamic Background in the North-Central Western**  
437 **Margin**

438 At the end of the Paleoproterozoic, the Ordos Block formed and  
439 merged with the North China Craton. Following this, under an  
440 extensional tectonic environment, large-scale rifting occurred, creating  
441 northeast-trending rift troughs with some structural inheritance from the  
442 basement. These troughs were subsequently covered by stratigraphic  
443 deposits from different periods (Bao et al., 2019; Zhao et al., 2019). In the  
444 Early Paleozoic, the Ordos region transitioned into a stable cratonic basin.  
445 During multiple marine transgressions and regressions, a set of  
446 widespread marine carbonate sediments, interbedded with clastic rocks,  
447 was deposited across the region. The large-scale Caledonian orogeny  
448 caused a depositional hiatus between the Ordovician and Carboniferous  
449 systems, resulting in an unconformable contact between the two. Since  
450 the Late Paleozoic, the Ordos Basin has transitioned from marine to  
451 terrestrial facies deposition, evolving from a coastal-continental margin to  
452 shallow marine sediments, dominated by swamp, deltaic, and fluvial  
453 deposits. During the Late Triassic to Early Cretaceous, the basin saw  
454 intracratonic fluvial-lacustrine sedimentation. Since the Late Cretaceous,  
455 the basin has experienced overall uplift and surrounding faulting. From  
456 the Late Mesozoic, the Ordos Basin became an independent sedimentary  
457 basin. Its sedimentary evolution has been primarily influenced by the





458 Mesozoic-Cenozoic tectonic systems, undergoing multiple sedimentary  
459 cycles and uplift-related transformations (Fig. 8).

460 The Yanshanian orogeny was the primary tectonic deformation  
461 period for the Ordos Basin, with the Late Jurassic tectonic movements  
462 being particularly intense. These movements caused the Jurassic and  
463 underlying sedimentary layers to become involved in widespread  
464 deformation, resulting in a clear angular unconformity with the overlying  
465 strata. This deformation was especially pronounced along the western  
466 margin of the basin, where much of the surface deformation that is  
467 observed today had already taken shape during this period (Darby et al.,  
468 2002). In the Early Cretaceous, the deep thermal material in the basin  
469 began to upwell, and the upper crust entered a tensional tectonic  
470 environment. Since the Late Cretaceous, the Ordos Basin has experienced  
471 significant uplift and erosion, a process that has continued to the present  
472 day (Ren et al., 2007, 2008, 2014, 2017, 2020, 2022).

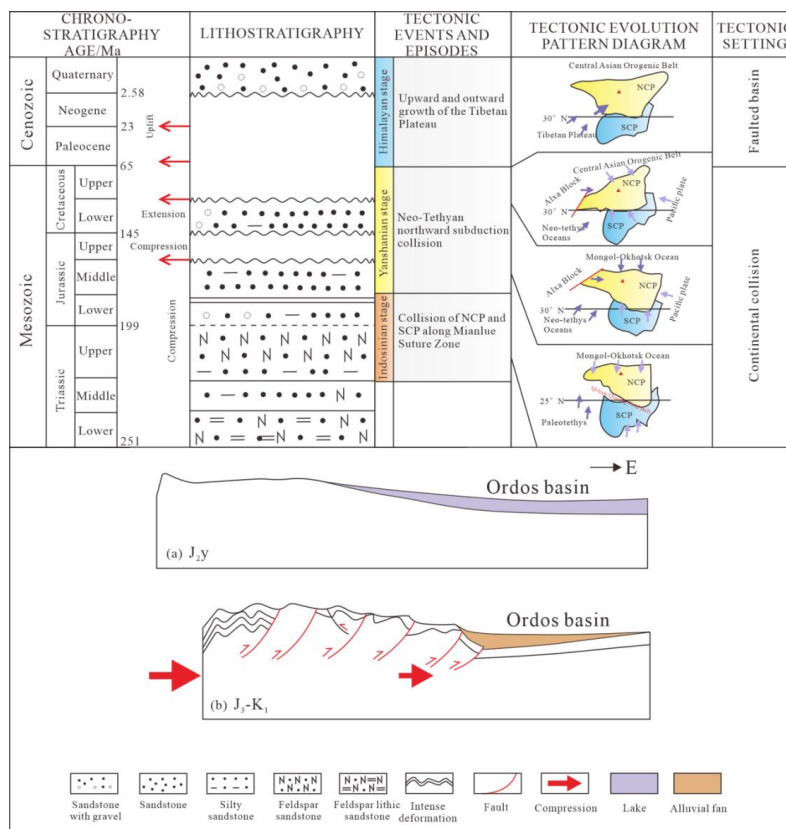

473

474 Fig.8 Dynamic model diagram of the northern part of the western margin of  
 475 Ordos Basin.(Modified from Ma, 2019; Zhang et al., 2021; Peng et al., 2022)

476 During the Triassic period, the Indosinian Orogeny significantly  
 477 impacted the region, leading to the final closure of the ancient  
 478 Qinling-Qilian Ocean Basin. The continuous collision and compression  
 479 of mountain ranges caused uplift and sedimentary hiatuses. As a result,  
 480 the Late Triassic and Early Jurassic strata exhibit a **parallel unconformity**  
 481 (Zhang et al., 2001).

482 In the Late Jurassic, the Yanshanian orogeny triggered the first major  
 483 large-scale uplift in the study area. During this period, the compressional  
 484 forces that were primarily north-south oriented during the earlier



485 Indosinian orogeny transitioned to an east-west orientation characteristic  
486 of the Yanshanian phase (Dong et al., 2007, 2008, 2015; Zhang et al.,  
487 2008). This tectonic uplift event aligns with the peak ages obtained from  
488 fission tracks at 170 Ma, 161 Ma, and 153 Ma. The tectonic evolution of  
489 this phase was controlled by several factors, notably the southwest Tethys  
490 tectonic domain, eastward compression from the Alxa Block , and the  
491 closure of the Okhotsk Ocean in the north during the Late Jurassic (Zhao  
492 et al., 2023). Additionally, far-field effects from the subduction of the  
493 Pacific Plate played a role (Darby et al., 2002, 2007; Faure et al., 2012;  
494 Liu et al., 1998; Yang et al., 2008; Zhang et al., 2020, 2021, 2022; Zhao et  
495 al., 2023). Previous paleomagnetic studies revealed that the Ordos Basin  
496 was undergoing a counterclockwise rotation during this period (Ma et al.,  
497 1993; Yang et al., 1999; Zhang et al., 2000). These regional tectonic  
498 processes collectively shaped the large-scale uplift and deformation seen  
499 during this period, marking a significant phase in the area's geological  
500 history. The comprehensive analysis of stress fields in the Late Jurassic  
501 indicates that multiple tectonic blocks around the Ordos Basin  
502 experienced subduction, collision, compression, and even mutual rotation.  
503 These interactions led to the folding and uplift of Jurassic strata,  
504 accompanied by a series of imbricate thrust faults pushing from west to  
505 east (Zhao et al., 1987; Ma et al., 2019; Zhang et al., 2021, 2022). In the  
506 northern section, the collision with the Alxa Block initiated significant



507 uplift, while in the southern part, the overall uplift of the Qilian  
508 Mountains and its thrusting into the basin resulted in strong thrusting  
509 structures. This contributed to the earlier onset of uplift in areas like  
510 Zhuozishan Mt. and the Majiatan-Huianbao regions. The compressional  
511 deformation shows a general pattern of stronger uplift and deformation in  
512 the west and at the margins, with weaker effects in the interior of the  
513 basin.

514       The Early Cretaceous was a crucial period in the evolution of the  
515 Ordos Basin. Northern China was under an extensional tectonic regime,  
516 linked to the broader lithospheric thinning and basin development of the  
517 North China Craton during the Early Cretaceous (Ren et al., 2020). In the  
518 central Taole region, extensional faults from this period are observable in  
519 seismic profiles (Zhao et al., 2007a). Towards the end of the Early  
520 Cretaceous, the regional tectonic stress field reversed due to the multiple  
521 phases of the Yanshanian orogeny (phases II, III, IV). The area was  
522 simultaneously influenced by the northward collision of the Yangtze Plate  
523 and the far-field effects of the Pacific Plate. The northern region was  
524 affected by the closure of the Okhotsk Ocean, and the western region  
525 continued to experience direct compression from the eastward movement  
526 of the Alxa Block (Yang et al., 2008; Zhang et al., 2020, 2022; Zhao et al.,  
527 2023). The previously deposited strata experienced intensified folding  
528 and uplift under compressional stress, ~~resulting in significant structural~~



529 ~~deformation~~. This led to the formation of large-scale south-north-oriented  
530 thrust faults and imbricate thrust structures. By this time, the region's  
531 major tectonic framework had largely formed, and subsequent tectonic  
532 movements primarily modified this existing structure.

533       During the Cenozoic, the tectonic deformation of the Ordos Basin  
534 was primarily driven by the collision between the Indian and Eurasian  
535 plates, with significant tectonic activity occurring during the Eocene to  
536 Miocene. The continued Himalayan orogeny caused strong tectonic  
537 movements in the region, leading to further uplift of the mountains, with  
538 the strata predominantly displaying parallel and angular unconformities.  
539 This tectonic activity has significantly shaped the present-day landscape.  
540 The neighboring Alxa region, located at the northeastern edge of the  
541 Tibetan Plateau, was affected by the plateau's Cenozoic uplift. Its  
542 deformation is closely linked to the evolution of the Tibetan Plateau  
543 (Zhang et al., 2023; Rao et al., 2016; Lei et al., 2022). Concurrently, the  
544 Pacific Plate continued its northwestward subduction during this period.  
545 Numerous geochronological records document the uplift and  
546 northeastward expansion of the northeastern Tibetan Plateau during the  
547 Cenozoic, particularly in the Eocene and Miocene (England and  
548 Housemann, 1986; Tapponnier et al., 2001; Wang et al., 2008; Lease et al.,  
549 2011, 2012; Craddock et al., 2011; Ding et al., 2022; Peng et al., 2019;  
550 Zhao et al., 2023; Chen et al., 2024; Zhang et al., 2020). Low-temperature



551 thermochronology data, along with thermal history reconstructions  
552 constrained by AHe and AFT, reveal rapid uplift during the Eocene to  
553 Miocene, likely a result of the far-field effects of the Cenozoic uplift of  
554 the northeastern Tibetan Plateau and the northwestward subduction of the  
555 Pacific Plate.

556 Overall, the study area has undergone the Indosinian, Yanshanian,  
557 and Himalayan orogenys since the Mesozoic era. The Indosinian tectonic  
558 stress originated from the collision and docking of the South China Plate  
559 and the North China Plate during the Triassic period, resulting in a  
560 north-south stress field. The tectonic stress of the Yanshanian orogeny  
561 originated from the Tethys tectonic domain, eastward compression of the  
562 Alxa block, westward subduction of the Pacific plate, and closure of the  
563 Okhotsk Ocean. In the northern part of the western margin of the basin,  
564 the Alxa rigid block sandwiched between the South China and North  
565 China plates is squeezed out in a southeast direction, directly affecting the  
566 Helanshan Mountains and the northern part of the western margin of the  
567 basin, causing the stress direction to shift towards a nearly east-west  
568 direction. The direction of the tectonic stress field in the Himalayan  
569 orogeny is influenced by the combined action of the Pacific Plate and the  
570 Tethys tectonic domain, changing from a north-south direction to a  
571 northeast direction. The main source of stress is the Tethys tectonic  
572 domain in the southwestern part of the study area.



## 573 **6 Conclusion**

574 (1) This study utilizes Apatite Fission Track (AFT) and Apatite  
575 (U-Th)/He (AHe) dating methods, combined with thermal history  
576 modeling ~~and existing geological evidence~~, to precisely constrain the  
577 uplift and cooling history of the central and northern sections of the  
578 western Ordos Basin. The analysis reveals significant differences in the  
579 timing and intensity of uplift across different regions: Zhuozishan part  
580 experienced a large-scale uplift during the Late Jurassic (160-150 Ma),  
581 followed by slow uplift between 130-30 Ma, and a more intense uplift  
582 phase after 30 Ma; Taole-Hengshanbao part began uplifting around  
583 155-145 Ma, followed by a period of slow uplift between 145-30 Ma, and  
584 experienced another phase of rapid uplift after 30 Ma; Majiatan-Huianbao  
585 part experienced a significant uplift between 158-137 Ma, with a slower  
586 uplift phase from 137-110 Ma, and a period of rapid uplift again between  
587 70-50 Ma. Overall, the northern and southern sections began uplifting  
588 earlier, while the middle section initiated uplift slightly later. These  
589 findings highlight the spatial variation in uplift timing and rates within  
590 the western Ordos Basin.

591 ~~(2) This study effectively reveals the uplift movements of the~~  
592 ~~northern section of the western margin during the Mesozoic and Cenozoic~~  
593 ~~using low-temperature thermochronology method.~~ It suggests that the  
594 Yanshanian orogeny had the most significant tectonic impact on the study



595 area. Multiple uplift events during the Mesozoic are responses to the  
596 multi-phase Yanshanian orogeny in this region. Since the Cenozoic, rapid  
597 uplift influenced by the Himalayan orogeny has shaped the current  
598 landscape.

### 599 **Competing interests**

600 The contact author has declared that none of the authors has any  
601 competing interests.

### 602 **Acknowledgements**

603 Financial support for this study were jointly provided by the Major  
604 Projects of Changqing Oilfield Company (ZDZX2021). Our heartfelt  
605 gratitude is given to those anonymous reviewers for their scientific and  
606 linguistic revisions to the manuscript.

### 607 **Conferences**

- 608 [1] Bao Hongping, Shao Dongbo, Hao Songli, et al. Basement Structure and Early  
609 Sedimentary Cover Evolution of the Ordos Basin[J]. Earth Science Frontiers, 2019,  
610 26(1): 33-43.
- 611 [2] Barbarand J, Carter A, Wood I, et al. Compositional and structural control of  
612 fission-track annealing in apatite[J]. Chemical Geology, 2003, 198(1-2): 107-137.
- 613 [3] Carlson W D, Donelick R A, Ketcham R A. Variability of apatite fission-track  
614 annealing kinetics: I. Experimental results[J]. American mineralogist, 1999, 84(9):  
615 1213-1223.
- 616 [4] Chen G M, Qin H T, Huang X F, et al. Cenozoic tectonic evolution of the Liupan  
617 Shan area: Evidence from zircon and apatite fission tracks[J]. Chinese Journal of  
618 Geophysics, 2024, 67(3): 1147-1168.
- 619 [5] Chen Gang, Wang Zhiwei, Bai Guojun, Sun Jianbo, Zhang Huiruo, Li Xiangdong.  
620 Peak Age Events and Their Sedimentary-Tectonic Responses in the  
621 Mesozoic-Cenozoic Ordos Basin[J]. Geology in China, 2007(03): 375-383.
- 622 [6] Chen Gang. Composition of Mesozoic Terrigenous Clastic Rocks and Their  
623 Tectonic Attributes in the Ordos Basin[J]. Acta Sedimentologica Sinica, 1999(03):  
624 409-413.
- 625 [7] Craddock W, Kirby E, Zhang H P. 2011. Late Miocene-Pliocenerange growth in



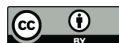

- 626 the interior of the northeastern Tibetan Plateau, *Lithosphere*, 3(6):420-438.
- 627 [8] Darby B J, Ritts B D. Mesozoic contractional deformation in the middle of the  
628 Asian tectonic collage: the intraplate Western Ordos fold-thrust belt, China[J]. *Earth  
629 and Planetary Science Letters*, 2002, 205(1-2): 13-24.
- 630 [9] Darby B J, Ritts B D. Mesozoic structural architecture of the Lang Shan,  
631 North-Central China: Intraplate contraction, extension, and synorogenic  
632 sedimentation[J]. *Journal of Structural Geology*, 2007, 29(12): 2006-2016.
- 633 [10] Ding L, Kapp P, Cai F, et al. Timing and mechanisms of Tibetan Plateau uplift[J].  
634 *Nature Reviews Earth & Environment*, 2022, 3(10): 652-667.
- 635 [11] Dong Shuwen, Zhang Yueqiao, Chen Xuanhua, et al. Formation and  
636 Deformation Characteristics of the Late Jurassic Multidirectional Convergent Tectonic  
637 System in East Asia[J]. *Acta Geoscientia Sinica*, 2008, 29(3): 306-317.
- 638 [12] Dong Shuwen, Zhang Yueqiao, Li Hailong, et al. The "Yanshan Movement" and  
639 the Late Mesozoic Multiplate Convergence Tectonics in East Asia: Commemorating  
640 the 90th Anniversary of the "Yanshan Movement"[J]. *Science in China: Earth  
641 Sciences*, 2019, 49(6): 913-938.
- 642 [13] Dong Shuwen, Zhang Yueqiao, Long Changxing, et al. New Interpretations of  
643 the Jurassic Tectonic Transformations and the Yanshan Movement in China[J]. *Acta  
644 Geologica Sinica*, 2007, 81(11): 1449-1461.
- 645 [14] Dong Yunpeng, Li Wei, Zhang Feifei, et al. Formation and Evolution of the  
646 Helan Mountain in the Northern Section of the North-South Tectonic Belt[J]. *Journal  
647 of Northwest University (Natural Science Edition)*, 2021, 51(6): 951-968
- 648 [15] England P, Houseman G, 1986. Finite strain calculations of  
649 continental deformation: 2. Comparison with the India-Asia Collision Zone. *Journal of  
650 Geophysical Research: Solid Earth*, 91(B3):3664-3676.
- 651 [16] Farley K A, Wolf R A, Silver L T. The effects of long alpha-stopping distances  
652 on (U-Th)/He ages[J]. *Geochimica et cosmochimica acta*, 1996, 60(21): 4223-4229.
- 653 [17] Faure M, Lin W, Chen Y. Is the Jurassic (Yanshanian) intraplate tectonics of  
654 North China due to westward indentation of the North China block?[J]. *Terra Nova*,  
655 2012, 24(6): 456-466.
- 656 [18] Flowers R M, Farley K A, Ketchum R A. A reporting protocol for  
657 thermochronologic modeling illustrated with data from the Grand Canyon[J]. *Earth  
658 and Planetary Science Letters*, 2015, 432: 425-435.
- 659 [19] Gallagher K. Transdimensional inverse thermal history modeling for quantitative  
660 thermochronology[J]. *Journal of Geophysical Research: Solid Earth*, 2012, 117(B2).
- 661 [20] Gan Kewen. On the Genesis Mechanism of Thrust Belts and Hydrocarbon  
662 Prospects of the Western Margin of the Ordos Basin[J]. In: Yang Junjie. *Thrust  
663 Tectonics and Hydrocarbon in the Western Ordos Basin*. Lanzhou: Gansu Science and  
664 Technology Press, 1990, 31239.
- 665 [21] Gao Feng, Wang Yuejun, Liu Shunsheng, Hu Baoqing. Study on the Thermal  
666 History of the Western Margin of the Ordos Basin Using Apatite Fission Track  
667 Analysis[J]. *Geotectonica et Metallogenia*, 2000(01): 87-91.
- 668 [22] Gao Shaohua. Mesozoic-Cenozoic Evolutionary Modification of the Lateral  
669 Structural Belt in the Central Western Ordos Basin and Its Significance for Oil and

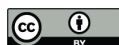

- 670 Gas[D]. Xi'an: Northwest University, 2014.
- 671 [23] Gleadow A J W, Seiler C, Rink W J, et al. Fission track dating and  
672 thermochronology[J]. Encyclopedia of scientific dating Methods, 2015: 285-296.
- 673 [24] Hasebe N, Barbarand J, Jarvis K, et al. Apatite fission-track chronometry using  
674 laser ablation ICP-MS[J]. Chemical Geology, 2004, 207(3-4): 135-145.
- 675 [25] He Dengfa, Sun Fangyuan, Zhai Yonghe, et al. Formation Evolution of the  
676 Shigouyi Anticline in the Western Ordos Basin and Its Tight Sandstone Gas  
677 Accumulation Model[J]. Oil & Gas Geology, 2021, 42(2): 370-390.
- 678 [26] Jiang Suyang, Huang Wenhui, Zhang Yongsheng, et al. Tectonic Setting and  
679 Provenance Analysis of the Sandstones from the Sandaokan Formation in the  
680 Northern Segment of the Western Ordos Basin[J]. Journal of Northeast Petroleum  
681 University, 2019, 43(4): 17-28.
- 682 [27] Ketcham R A, Carter A, Donelick R A, et al. Improved modeling of fission-track  
683 annealing in apatite[J]. American Mineralogist, 2007, 92(5-6): 799-810.
- 684 [28] Ketcham R A. Forward and inverse modeling of low-temperature  
685 thermochronometry data[J]. Reviews in mineralogy and geochemistry, 2005, 58(1):  
686 275-314.
- 687 [29] Lease R O, Burbank D W, Hough B, et al. 2012. Pulsed Miocene growth in  
688 northeastern Tibet: insights from Xunhua Basin magnetostratigraphy and provenance.  
689 GSA Bull., 124(5-6):657-677.
- 690 [30] Lease R.O., Burbank D W, Clark M K, et al. 2011. Middle  
691 Miocene reorganization of deformation along the northeastern Tibetan Plateau,  
692 Geology, 39(4):359-362.
- 693 [31] Lei Q, Yu J, Zhang P, et al. Tectonic geomorphology and prehistoric earthquakes  
694 of the West Helanshan fault, West Ordos, and its implications for regional tectonics  
695 and seismic hazard[J]. Tectonophysics, 2022, 833: 229375.
- 696 [32] Li Bin. Study on the Thrust Belt Structure and Hydrocarbon Controlling Factors  
697 in the Western Ordos Basin[D]. Northwest University, 2019.
- 698 [33] Li Bin. Tectonic Characteristics and Hydrocarbon Accumulation Studies of the  
699 Foreland Basin in the Western Ordos Basin[D]. Graduate School of the Chinese  
700 Academy of Sciences (Guangzhou Institute of Geochemistry), 2006.
- 701 [34] Li Tianbin. Characteristics and Evolution of Thrust Structures in the Western  
702 Ordos Basin[D]. China University of Geosciences (Beijing), 2006.
- 703 [35] Liu Chiyang, Zhao Hongge, Wang Feng, et al. Mesozoic Tectonic  
704 Characteristics of the Western Margin of the Ordos Basin[J]. Acta Geologica Sinica,  
705 2005, 79(6): 737-747.
- 706 [36] Liu Hefu. Types of Foreland Basins and Styles of Fold-Thrust Structures[J].  
707 Earth Science Frontiers, 1995, 2(3): 59-68.
- 708 [37] Liu Jianhui. Cenozoic Extensional Uplift of the Helan Mountains and Qinling  
709 Mountains and Analysis of Fault Frictional Heating Using Apatite Fission Track  
710 Method[J]. International Seismological Dynamics, 2010, 31(3): 31-33.
- 711 [38] Liu S F, The coupling mechanism of basin and orogen in the western ordos  
712 Basin and adjacent regions of China[J]. Journal of Asian Earth  
713 Science, 1998, 16(4):369-383.



- 714 [39] Liu Shaofeng, Yang Shigong. North-South Differences and Their Formation  
715 Mechanism on the Western Margin of the Ordos Basin[J]. Geological Science, 1997,  
716 32(3): 397-408.
- 717 [40] Ma Jinghui, He Dengfa. Mesozoic-Cenozoic Tectonic Events in the Helan  
718 Mountain Tectonic Belt and Adjacent Areas: Constraints from Unconformities and  
719 Fission Track Analysis[J]. Acta Petrologica Sinica, 2019, 35(4): 1121-1142.
- 720 [41] Ma X.H., Xing L.S., Yang Z.Y., et al. Paleomagnetic Study of the Ordos Basin  
721 since the Late Paleozoic [J]. Chinese Journal of Geophysics, 1993, (01): 68-79.
- 722 [42] Ouyang Zhengjian, Chen Hongde, Feng Juanping. Tectonic Characteristics and  
723 Evolution of the Central and Southern Segments of the Western Margin of the Ordos  
724 Basin[J]. Modern Geology, 2012, 26(04): 691-695.
- 725 [43] Peng H , Wang J , Liu C ,et al. Thermochronological constraints on the  
726 Meso-Cenozoic tectonic evolution of the Haiyuan-Liupanshan region, northeastern  
727 Tibetan Plateau[J]. Journal of Asian earth sciences, 2019,  
728 183(Oct.1):103966.1-103966.13.
- 729 [44] Peng H, Wang J, Liu C, et al. Mesozoic exhumation and ca. 10 Ma reactivation  
730 of the southern Yin Shan, North China, revealed by low-temperature  
731 thermochronology[J]. Tectonophysics, 2022, 823: 229189.
- 732 [45] Peng Heng. Fission Track Thermochronology Analysis and Its Geological  
733 Significance in the Southwestern Adjacent Area of the Ordos Block[D]. Northwest  
734 University, 2020.
- 735 [46] Rao G, Chen P, Hu J, et al. Timing of Holocene paleo-earthquakes along the  
736 Langshan Piedmont Fault in the western Hetao Graben, North China: Implications for  
737 seismic risk[J]. Tectonophysics, 2016, 677: 115-124.
- 738 [47] Ren Zhanli, Cui Junping, Qi Kai. New Advances in the Theoretical Research and  
739 Methods for Restoring the Thermal Evolution History of Deep and Ultra-deep Layers  
740 in Overlapping Basins[J]. Journal of Northwest University (Natural Science Edition),  
741 2022, 52(6): 910-929.
- 742 [48] Ren Zhanli, Liu Li, Cui Junping, et al. Application of Tectonic Thermal  
743 Evolution History in the Study of Hydrocarbon Accumulation Phases[J]. Oil & Gas  
744 Geology, 2008, 29(4): 502-506.
- 745 [49] Ren Zhanli, Qi Kai, Liu Runchuan, et al. The Dynamical Background of Early  
746 Cretaceous Tectonic Thermal Events in the Ordos Basin and Their Control on the  
747 Accumulation Periods of Various Minerals, Including Oil and Gas[J]. Acta  
748 Petrologica Sinica, 2020, 36(4): 1213-1234.
- 749 [50] Ren Zhanli, Tian Tao, Li Jinbu, et al. Research Methods for Thermal Evolution  
750 History of Sedimentary Basins and Progress in Reconstructing Thermal Evolution  
751 History of Overlapping Basins[J]. Journal of Earth Sciences and Environment, 2014,  
752 36(3): 1-20.
- 753 [51] Ren Zhanli, Yu Qiang, Cui Junping, Qi Kai, Chen Zhanjun, Cao Zhanpeng, Yang  
754 Peng. Thermal Evolution History of the Ordos Basin and Its Control on  
755 Hydrocarbons[J]. Earth Science Frontiers, 2017, 24(03): 137-148.
- 756 [52] Ren Zhanli, Zhang Sheng, Gao Shengli, Cui Junping, Xiao Yuanyuan, Xiao Hui.  
757 Tectonic Thermal Evolution History of the Ordos Basin and Its Significance for



- 758 Accumulation and Mineralization[J]. *Science in China: Series D, Earth Sciences*,  
759 2007(S1): 23-32.
- 760 [53] Ren Zhanli. Study on the Geothermal History of the Ordos Basin Using the  
761 Apatite Fission Track Method[J]. *Chinese Journal of Geophysics*, 1995, 38(03):  
762 339-349..
- 763 [54] Tang Xiyuan, Guo Zhongming, Wang Dingyi. Characteristics, Evolution, and  
764 Hydrocarbon Exploration of the Thrust Nappe Structure Belt in the Western Ordos  
765 Basin[J]. *Oil & Gas Geology*, 1988, 9(1): 1-10.
- 766 [55] Tang Xiyuan. Thrust Nappe Structures and Hydrocarbon Exploration on the  
767 Western Margin of the Shaanxi-Gansu-Ningxia Basin[M]. Xi'an: Northwest  
768 University Press, 1992.
- 769 [56] Tapponnier P, XuZ Q, Roger F, et al. 2001. Oblique stepwise rise and growth of  
770 the Tibet Plateau. *Science*, 294(5547):1671-1677.
- 771 [57] Tian Chaoyang, Chen Hong, Liu Xinshe, et al. Fission Track Ages and Mesozoic  
772 Tectonic Uplift in the Niushou Mountain—Luoshan Area of the Western Ordos[J].  
773 *Journal of Geological Mechanics*, 2023, 29(05): 599-617.
- 774 [58] Vermeesch P. RadialPlotter: A Java application for fission track, luminescence  
775 and other radial plots[J]. *Radiation Measurements*, 2009, 44(4): 409-410.
- 776 [59] Wang CS, Zhao XX, Liu ZF, et al. 2008. Constraints on the early uplift history of  
777 the Tibetan Plateau, *Proc, Natl. Acad. Sci. USA*, 105(13):4987-4992
- 778 [60] Yang Hua, Fu Jinhua, Ouyang Zhengjian, Sun Liuyi. Analysis of  
779 Tectonic-Sedimentary Environments during the Late Triassic in the Western Margin  
780 of the Ordos Basin[J]. *Acta Sedimentologica Sinica*, 2011, 29(03): 427-439.
- 781 [61] Yang J.J., Zhang B.R. Basic Characteristics of the Overthrust Belt on the  
782 Western Margin of the Ordos Basin[A]. In: Yang J.J., Zhao Z.Y., Liu H.F., et al.  
783 Structure and Oil and Gas of the Overthrust Belt on the Western Margin of the Ordos  
784 Basin[C]. Lanzhou: Gansu Science and Technology Press, 1990. 91-105.
- 785 [62] Yang Junjie, Zhang Borong. Strike-Slip Rift and Associated Thrust Belt: A Case  
786 Study of the Yinchuan Graben and Hengshanpu Thrust Belt[J]. *Petroleum Exploration  
787 and Development*, 1986(02): 1-8.
- 788 [63] Yang S.B., Geng X.X., Guo Q.Y., et al. Mesozoic Tectonic Evolution in the  
789 Northern Section of the Western Margin of the Ordos Basin[J]. *Geological Review*,  
790 2008, 54(3): 307-315.
- 791 [64] Yang Shengbin, Geng Xinxia, Guo Qingyin, et al. Mesozoic Tectonic Evolution  
792 of the Northern Segment of the Western Ordos Basin[J]. *Geological Review*, 2008,  
793 54(3): 307-315.
- 794 [65] Yang Shengbin, Guo Qingyin, Hou Guiting, et al. Subsidence History and  
795 Sedimentary Response in the Northern Segment of the Western Ordos Basin[J].  
796 *Journal of Peking University: Natural Science Edition*, 2006, 42(2): 192-198.
- 797 [66] Zhai Mingguo. The Formation, Evolution, and Metallogenesis of the North  
798 China Craton[J]. *Mineral Deposits*, 2010 (1): 24-36.
- 799 [67] Zhai Mingguo. The Ordos Block: The Key to Unraveling the Mysteries of Early  
800 Continental Formation, Evolution, and Tectonic Regime of the North China Craton[J].  
801 *Chinese Science Bulletin*, 2021, 66(26): 3441-3461.



- 802 [68] Zhang Chengli, Gou Longlong, Liu Xinyu, et al. Precambrian Geological Events,  
803 Nature, and Geological Significance of the Basement in the Western North China  
804 Craton[J]. *Acta Petrologica Sinica*, 2018, 34(4): 981-998.
- 805 [69] Zhang Guowei, Dong Yunpeng, Yao Anping. A New Starting Point for the Study  
806 of Orogenic Belts and Orogenesis[J]. *Northwest Geology*, 2001, 34(1): 1-9.
- 807 [70] Zhang J, Cunningham D, Qu J, et al. Poly-phase structural evolution of the  
808 northeastern Alxa Block, China: Constraining the Paleozoic-Recent history of the  
809 southern central Asian Orogenic belt[J]. *Gondwana Research*, 2022, 105: 25-50.
- 810 [71] Zhang J, Wang Y, Qu J, et al. Mesozoic intracontinental deformation of the Alxa  
811 Block in the middle part of Central Asian Orogenic Belt: A review[J]. *International  
812 Geology Review*, 2021, 63(12): 1490-1520.
- 813 [72] Zhang J, Yun L, Zhang B, et al. Deformation at the easternmost Altyn Tagh Fault:  
814 Constraints on the growth of the northern Qinghai–Tibetan plateau[J]. *Acta Geologica  
815 Sinica-English Edition*, 2020, 94(4): 988-1006.
- 816 [73] Zhang J., Ma Z.J., Ren W.J. Mechanism of North-South Differences in the  
817 Overthrust Belt on the Western Margin of the Ordos Basin[J]. *Geotectonica et  
818 Metallogenia*, 2000(02): 124-133.
- 819 [74] Zhang Jiasheng, He Zixin, Fei Anqi, et al. Large Margin Thrust Nappe System in  
820 the Northern Segment of the Western Ordos Basin[J]. *Geological Science*, 2008, 43(2):  
821 251-281.
- 822 [75] Zhang Jin, Zhang Beihang, Zhao Heng, et al. Characteristics and Mechanisms of  
823 Late Cenozoic Deformation in the Beishan-Alashan Region[J]. *Earth Science  
824 Frontiers*, 2023, 30(5): 334.
- 825 [76] Zhao Chongyuan, Liu Chiyang, Ren Zhanli. Geology of Oil and Gas Basins and  
826 System Engineering in Their Research[J]. *Oil & Gas Geology*, 1990, 11(1): 108-113.
- 827 [77] Zhao D., Chen P., Li R.X., et al. Basin Records of Multistage Tectonic Uplift in  
828 the Longshou Mountain of the Northeastern Tibetan Plateau during the Late Cenozoic  
829 [J]. *Acta Petrologica Sinica*, 2023, 39(12): 3759-3774.
- 830 [78] Zhao Hongge, Liu Chiyang, Wang Feng, et al. Tectonic Partitioning and  
831 Characteristics of the Western Margin of the Ordos Basin[J]. *Oil & Gas Geology*,  
832 2006, 27(2): 173-179.
- 833 [79] Zhao Hongge, Liu Chiyang, Wang Feng, et al. Uplift Timing and Evolution of  
834 the Helan Mountains[J]. *Science in China: Series D*, 2007, 37(A01): 185-192.
- 835 [80] Zhao Hongge, Liu Chiyang, Wang Jianqiang, et al. Exploration of Tectonic  
836 Attributes during the Late Triassic in the Western Ordos Basin[J]. *Geological Journal  
837 of China*, 2007, 34(3): 384-391.
- 838 [81] Zhao Hongge, Liu Chiyang, Yao Yaming, Wang Feng, Yin Yan. Fission Track  
839 Evidence of Differential Uplift in the Western Ordos Basin[J]. *Journal of Northwest  
840 University (Natural Science Edition)*, 2007, (03): 470-474.
- 841 [82] Zhao Hongge. Tectonic Characteristics and Evolution of the Western Ordos  
842 Basin[D]. Northwest University, 2003.
- 843 [83] Zhao Pan, Xu Bei, Chen Yan. Mongolian–Okhotsk Ocean: Evolutionary Process  
844 and Final Closure[J]. *Science in China: Earth Sciences*, 2023, 53(11): 2541-2559.
- 845 [84] Zhao X, Coe R S. 1987.Palaeomagnetic constraints on the collision and rotation



846 of North and South China. *Nature*, 327:41-144.  
847 [85] Zhao Xiaochen. *Mesozoic Tectonic Evolution and Later Modification of the*  
848 *Northern Section of the North-South Tectonic Belt in China*[D]. Xi'an: Northwest  
849 University, 2017.  
850 [86] Zhao Y, Liu X, Hu J, et al. Metamorphism of diverse basement gneisses of the  
851 Ordos Basin: Record of multistage Paleoproterozoic orogenesis and constraints on the  
852 evolution of the western North China Craton[J]. *Precambrian Research*, 2019, 328:  
853 48-63.  
854 [87] Zhuo Yuzhou. *Determination of Mesozoic-Cenozoic Uplift Events in the*  
855 *Zhuozishan Area of the Northwestern Ordos Basin and Their Tectonic*  
856 *Significance*[D]. Northwest University, 2015.  
857
